# Supplementary material
Source: PubMed Central journal article supplement (PMC6349107)
Supplement: supp_RA118.002504_136116_2_supp_239566_pj5vr7.pdf [file supp_RA118.002504_136116_2_supp_239566_pj5vr7.pdf]

## SUPPORTING INFORMATION

Identification of two segments of the  $\gamma$  subunit of ATP synthase responsible for the different affinities of the catalytic nucleotide binding sites

**Nelli Mnatsakanyan, Yunxiang Li, and Joachim Weber**

Table S1: Conservation of Residues in the  $\gamma$ 5-15 Segment

Table S2: Conservation of Residues in the  $\gamma$ 256-265 Segment

Fig. S1: Purity and long-term stability of the enzyme preparations

Fig. S2:  $\gamma$  content of the truncation mutants

Fig. S3: Possible interactions of the segments  $\gamma$ 5-15 and  $\gamma$ 256-265 with  $\alpha$  and  $\beta$

Table S1

Conservation of Residues in the  $\gamma$ 5-15 Segment

| Species                               | Position | $\gamma$ 5             | $\gamma$ 15 |
|---------------------------------------|----------|------------------------|-------------|
| <i>Bos taurus</i>                     |          | D I T R R L K S I K N  |             |
| <i>Gallus gallus</i>                  |          | D I T R R L K S I K N  |             |
| <i>Danio rerio</i> (zebrafish)        |          | D I T I R L K S I K N  |             |
| <i>Drosophila melanogaster</i>        |          | M I S I R L K S V K N  |             |
| <i>Saccharomyces cerevisiae</i>       |          | E V E M R L K S I K N  |             |
| <i>Neurospora crassa</i>              |          | E I E T R L K S I R N  |             |
| <i>Arabidopsis thaliana</i>           |          | E L R E R I D S V K N  |             |
| <i>Spinacia oleracea</i>              |          | E L R D R I G S V K N  |             |
| <i>Escherichia coli</i>               |          | E I R S K I A S V Q N  |             |
| <i>Clostridium acetobutylicum</i>     |          | I I K R R I K S I T N  |             |
| <i>Vibrio alginolyticus</i>           |          | E I R N K I G S V K S  |             |
| <i>Bacillus subtilis</i>              |          | D I K S R I T S T K K  |             |
| <i>Geobacillus stearothermophilus</i> |          | D I K T R I N A T K K  |             |
| <i>Bacillus</i> sp. strain TA2.A1     |          | E I K R R I R S V K N  |             |
| <i>Wolinella succinogenes</i>         |          | E I R K K I T S V K N  |             |
| <i>Thermotoga maritima</i>            |          | Q I K R K I N A T Q S  |             |
| <i>Synechococcus elongatus</i>        |          | A I R D R I K S V R N  |             |
| Consensus                             |          | <b>h p + h s b p p</b> |             |

The table lists the amino acids found in selected species in the  $\gamma$ 5-15 segment which is responsible for determination of the affinity of the catalytic sites. Residue numbers refer to the *G. stearothermophilus* enzyme. Consensus annotation: **b**,  $\beta$ -branched residue; **h**, hydrophobic residue; **p**, polar residue; **s**, small residue; +, positively charged residue.

Table S2

Conservation of Residues in the  $\gamma$ 256-265 Segment

| Species                               | Position | $\gamma$ 256   | $\gamma$ 265 |
|---------------------------------------|----------|----------------|--------------|
| <i>Bos taurus</i>                     |          | DKLTLTFNRT     |              |
| <i>Gallus gallus</i>                  |          | DKLTLTFNRT     |              |
| <i>Danio rerio</i>                    |          | DKLTLTFNRT     |              |
| <i>Drosophila melanogaster</i>        |          | DKLTLTFNRT     |              |
| <i>Saccharomyces cerevisiae</i>       |          | NRYSILYNRT     |              |
| <i>Neurospora crassa</i>              |          | SKYQILFNRT     |              |
| <i>Arabidopsis thaliana</i>           |          | KSLSMVYNRA     |              |
| <i>Spinacia oleracea</i>              |          | KTLSINYNRA     |              |
| <i>Escherichia coli</i>               |          | KEQLLVYNKA     |              |
| <i>Clostridium acetobutylicum</i>     |          | DALNIKYNRI     |              |
| <i>Vibrio alginolyticus</i>           |          | DDLELVYNKA     |              |
| <i>Bacillus subtilis</i>              |          | DSL SLSYNRA    |              |
| <i>Geobacillus stearothermophilus</i> |          | RTL T LSYNRA   |              |
| <i>Bacillus</i> sp. strain TA2.A1     |          | ETLTLQFNRA     |              |
| <i>Wolinella succinogenes</i>         |          | KSLTIAYNKA     |              |
| <i>Thermotoga maritima</i>            |          | RELTLAYNKA     |              |
| <i>Synechococcus elongatus</i>        |          | GQLTLVYNKA     |              |
| Consensus                             |          | <b>hph aN+</b> |              |

The table lists the amino acids found in selected species in the  $\gamma$ 256-265 segment which is responsible for determination of the affinity of the catalytic sites. Residue numbers refer to the *G. stearothermophilus* enzyme. Consensus annotation: **a**, aromatic residue; **h**, hydrophobic residue; **p**, polar residue; **+**, positively charged residue.

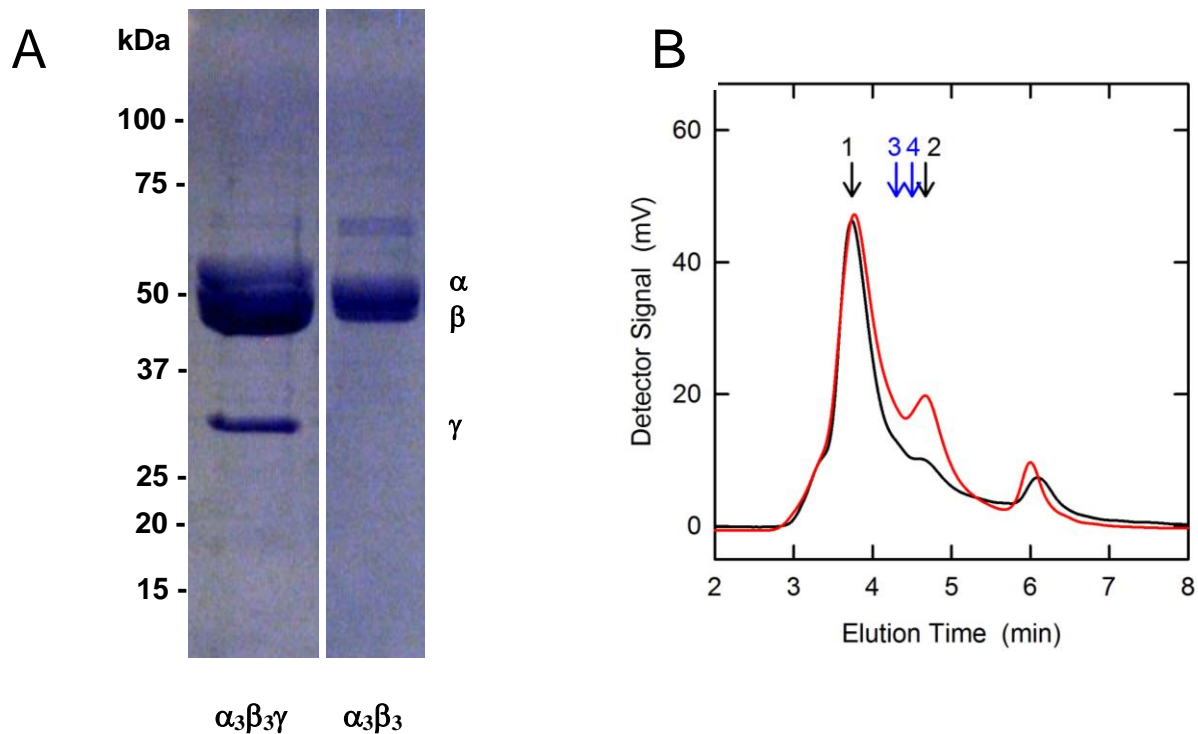

Fig. S1. **Purity and long-term stability of the enzyme preparations.** (A) SDS-PAGE of  $\alpha_3\beta_3\gamma$  (left) and  $\alpha_3\beta_3$  (right). The gel was run within a week of preparation of the enzymes. The positions of marker protein bands are indicated. (B) Size exclusion chromatography of  $\alpha_3\beta_3\gamma$  (black) and  $\alpha_3\beta_3$  (red) of samples stored for more than four years as ammonium sulfate precipitate at 4 °C. UV absorbance at 280 nm was recorded as signal. Traces represent the average of two runs. Peak 1 at 3.7 min corresponds to  $\alpha_3\beta_3\gamma$  or  $\alpha_3\beta_3$  (352 kDa and 320 kDa, respectively), peak 2 at 4.7 min to isolated  $\alpha$  or  $\beta$  subunits (55 kDa and 52 kDa, respectively). The blue arrows (3 and 4) indicate the elution times (4.3 and 4.5 min) for lactate dehydrogenase (137 kDa) and bovine serum albumin (66 kDa), respectively.

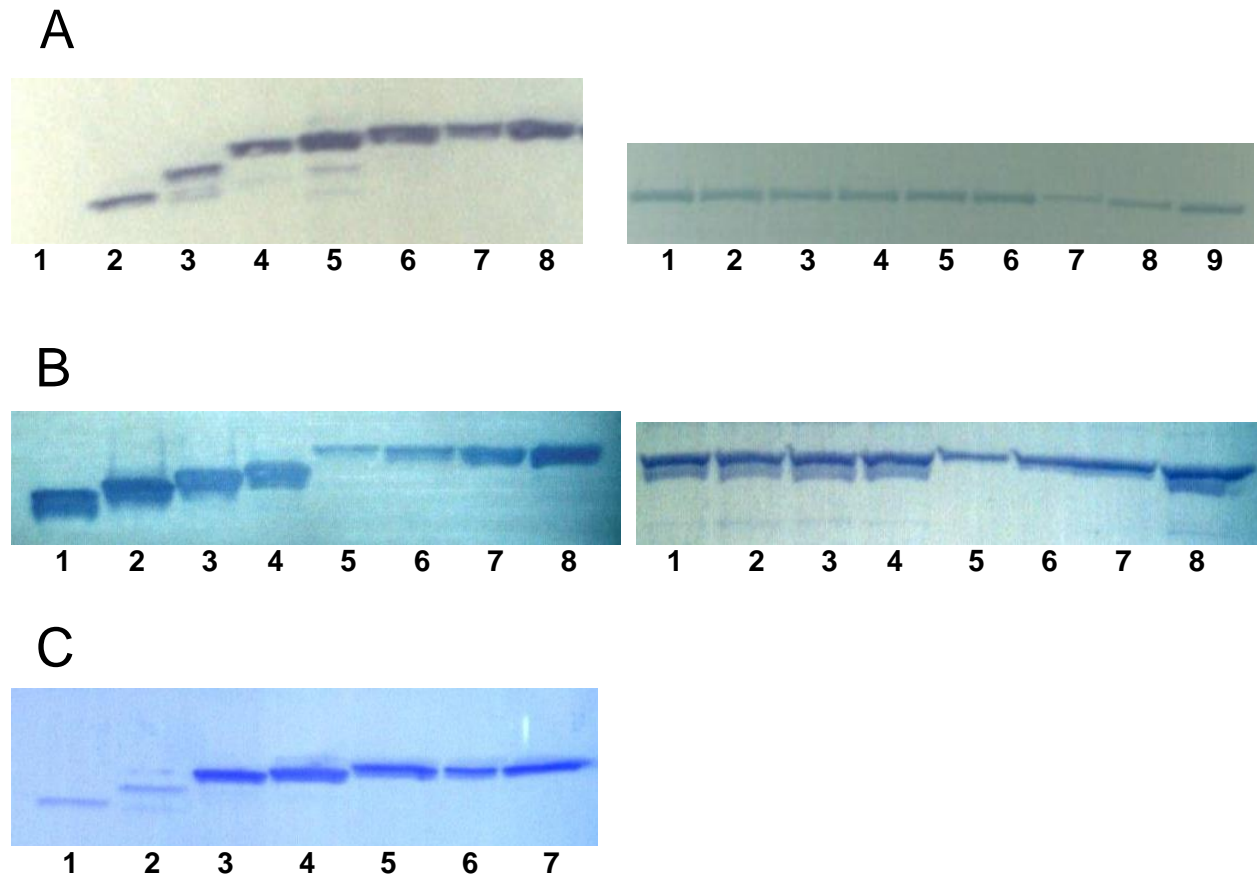

Fig. S2.  $\gamma$  content of the truncation mutants. Western blots with a primary antibody against the globular portion of  $\gamma$  are shown. Figs. A and B also show a control experiment with an anti- $\beta$  antibody (right-hand panel). (A)  $\alpha_3\beta_3$  and N-terminal truncations. Left panel: anti- $\gamma$  antibody. 5  $\mu\text{g}$  protein was loaded per lane, except for lane 7 (2.5  $\mu\text{g}$ ). Lane 1,  $\alpha_3\beta_3$ ; lane 2,  $\gamma\Delta\text{N}45$ ; lane 3,  $\gamma\Delta\text{N}29$ ; lane 4,  $\gamma\Delta\text{N}13$ ; lane 5,  $\gamma\Delta\text{N}9$ ; lane 6,  $\gamma\Delta\text{N}4$ ; lanes 7 and 8, wild-type  $\alpha_3\beta_3\gamma$ . Right panel; anti- $\beta$  antibody. 5  $\mu\text{g}$  protein was loaded per lane, except for lanes 7 (1.25  $\mu\text{g}$ ) and 8 (2.5  $\mu\text{g}$ ). Lane 1,  $\alpha_3\beta_3$ ; lane 2,  $\gamma\Delta\text{N}45$ ; lane 3,  $\gamma\Delta\text{N}29$ ; lane 4,  $\gamma\Delta\text{N}13$ ; lane 5,  $\gamma\Delta\text{N}9$ ; lane 6,  $\gamma\Delta\text{N}4$ ; lanes 7 to 9, wild-type  $\alpha_3\beta_3\gamma$ . (B) C-terminal truncations. Left panel: anti- $\gamma$  antibody; right panel: anti- $\beta$  antibody. 20  $\mu\text{g}$  protein was loaded per lane, except for lanes 5 (2.5  $\mu\text{g}$ ), 6 (5  $\mu\text{g}$ ), and 7 (10  $\mu\text{g}$ ). Lane 1,  $\gamma\Delta\text{C}36$ ; lane 2,  $\gamma\Delta\text{C}27$ ; lane 3,  $\gamma\Delta\text{C}20$ ; lane 4,  $\gamma\Delta\text{C}14$ ; lanes 5 to 8, wild-type  $\alpha_3\beta_3\gamma$ . (C) N-terminal truncations after fluorescence binding assay and Centricon (see RESULTS). 5  $\mu\text{g}$  protein was loaded per lane, except for lane 6 (2.5  $\mu\text{g}$ ). Lane 1,  $\gamma\Delta\text{N}45$ ; lane 2,  $\gamma\Delta\text{N}29$ ; lane 3,  $\gamma\Delta\text{N}13$ ; lane 4,  $\gamma\Delta\text{N}9$ ; lane 5,  $\gamma\Delta\text{N}4$ ; lanes 6 and 7, wild-type  $\alpha_3\beta_3\gamma$ . The blue tinge in some of the blots is due to the filter setting used to take the picture.

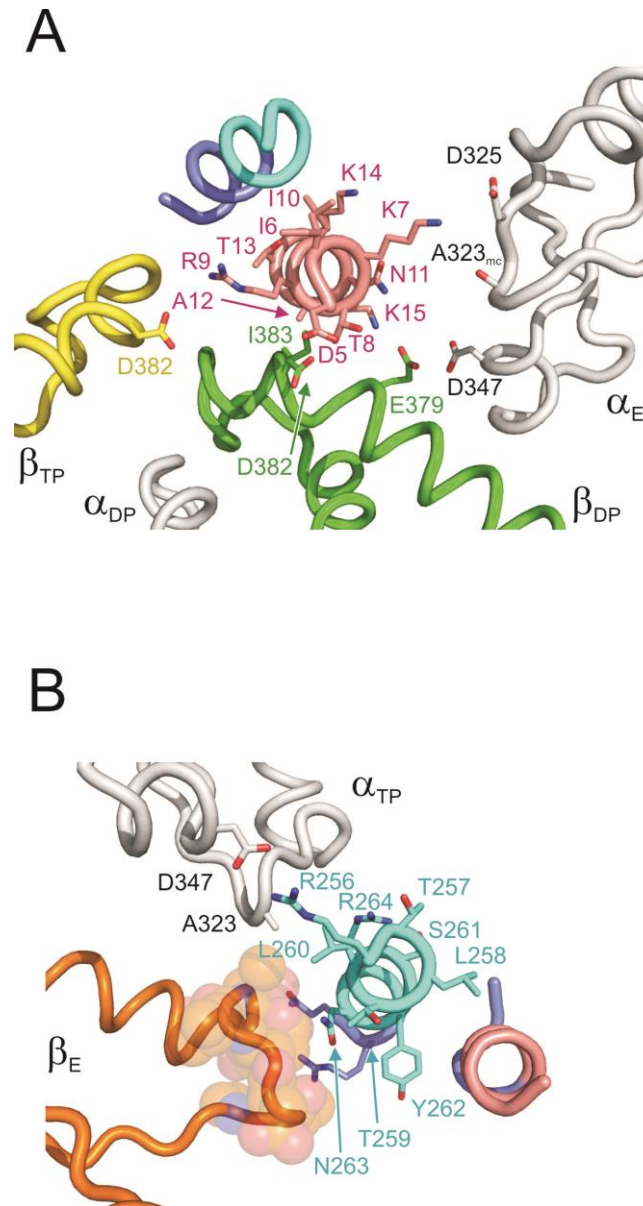

Fig. S3. **Possible interactions of the segments  $\gamma$ 5-15 and  $\gamma$ 256-265 with  $\alpha$  and  $\beta$ .** (A)  $\gamma$ 5-15.  $\gamma$ 5-15 is shown in pink; subunits  $\alpha_E$  and  $\alpha_{DP}$  are colored light grey,  $\beta_{DP}$  green, and  $\beta_{TP}$  yellow. Amino acids in  $\alpha_E$ ,  $\beta_{DP}$  and  $\beta_{TP}$  that might make contact with side chains of  $\gamma$ 5-15 are shown in “stick” representation and labeled (subscript “mc” indicates main chain atoms). The portion of the C-terminal helix of  $\gamma$  running antiparallel to segment  $\gamma$ 5-15 is shown in cyan ( $\gamma$ 256-265) and purple. (B)  $\gamma$ 256-265.  $\gamma$ 256-265 is shown in cyan,  $\alpha_{TP}$  in light grey, and  $\beta_E$  in orange; residue  $\gamma$ A265 is hidden in this view. Amino acids in  $\alpha_{TP}$  that might make contact with side chains of  $\gamma$ 256-265 are shown in “stick” representation and labeled. The most intensive contacts between the C-terminal helix of  $\gamma$  and the “catch loop” of  $\beta_E$  (shown in transparent “spacefill”) are formed by the two residues immediately downstream of the identified segment,  $\gamma$ R266 and  $\gamma$ Q267 (shown in purple and unlabeled). The portion of the C-terminal helix of  $\gamma$  running antiparallel to segment  $\gamma$ 256-265 is shown in pink ( $\gamma$ 5-15) and purple.
